# Supplementary material for: Further Delineation of Phenotype and Genotype of Primary Microcephaly Syndrome with Cortical Malformations Associated with Mutations in the WDR62 Gene
Source: MDPI journal article supplement (doi:10.3390/genes12040594), 2021-04-19
Supplement: s1 [file s1]

## Supplementary Materials

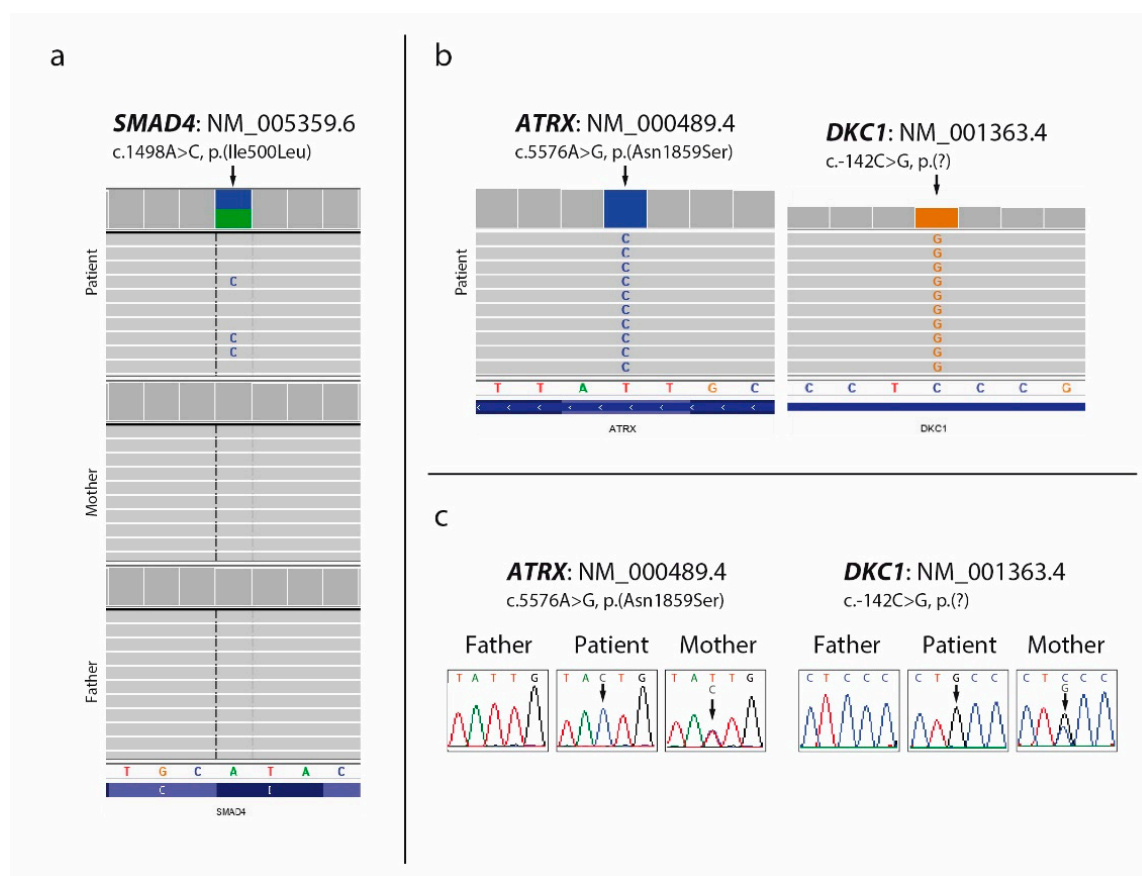

**Figure S1.** The Integrative Genomics Viewer (IGV) from Amplicon Deep Sequencing (a), IGV from Whole Exome Sequencing (b) and Sanger confirmation (c) of additional WES molecular findings. IGV of c.1498A>C, p.(Ile500Leu) variant found in *SMAD4* gene of case 2 (a). IGV and Sanger sequencing plots of p.5576A>G, p.(ASN1859Ser) variant found in *ATRX* gene of case 3, and c.-142C>G (p.?) variant found in *DKC1* gene of case 3 (b,c).

**Table S1.** Summary of the published mutations in the *WDR62* gene.

| No | Mutation (DNA level) | Mutation (amino acid level) | Exon/Intron | Homo-/heterozygosity | Type mutation | Population        | References  |
|----|----------------------|-----------------------------|-------------|----------------------|---------------|-------------------|-------------|
| 1  | c.28G>T              | p.Ala10Ser                  | 1           | ht                   | M             | chinese           | 7           |
| 2  | c.189G>T             | p.Glu63Asp                  | 2           | ht                   | M             | chinese           | 7           |
| 3  | c.193G>A             | p.Val65Met                  | 2           | h                    | M             | saudi             | 22,29       |
| 4  | c.194T>A             | p.Val65Glu                  | 2           | ht                   | M             | polish            | case 2      |
| 5  | c.332G>C             | p.Arg111Thr                 | 3           | h                    | M             | pakistani         | 13          |
| 6  | c.363delT            | p.Asp112Metfs*5             | 4           | h                    | fs            | mexican           | 29          |
| 7  | c.390G>A             | p.Glu130Glu                 | 4           | h                    | M             | sudan             | 8           |
| 8  | c.535_536insA        | p.Met179fs*21               | 5           | h                    | fs            | indian            | 9           |
| 9  | c.617G>C             | p.Trp224Ser                 | 6           | h                    | M             | turkish           | 10          |
| 10 | c.668T>C             | p. Phe223Ser                | 6           | h                    | M             | romani            | 27          |
| 11 | c.731C>T             | p.Ser244Leu                 | 7           | ht                   | M             | japanese          | 17          |
| 12 | c.797C>T             | p.Ala266Val                 | 7           | ht                   | M             | saudi             | 20          |
| 13 | c.900C>A             | p.Cys300*                   | 8           | h                    | N             | indian            | 9           |
| 14 | c.883-1273_850del    | del ex 8-9                  | 8-9         | h                    | del           | pakistani /korean | 25          |
| 15 | c.883-4_890del       | del intron 7 +exon8         | 8           | ht                   | del           | korean            | 24          |
| 16 | c.1027C>T            | p. Gln343*                  | 8           | h                    | N             | morrocan          | 30          |
| 17 | c.1043+1G>A          | p.Ser348Argfs*63            | 8           | h                    | ss            | turkish           | 29          |
| 18 | c.1102G>A            | p.Asp368Asn                 | 9           | ht                   | M             | saudi             | 20          |
| 19 | c.1143delA           | p.His381Profs*48            | 9           | h                    | fs            | pakistani         | 16          |
| 20 | c.1194G>A            | p.Trp398                    | 9           | h                    | M             | pakistani         | 12,13       |
| 21 | c.1198G>A            | p.Glu400Lys                 | 9           | h                    | M             | spanish           | 6           |
| 22 | c.1313G>A            | p.Arg438His                 | 10          | h                    | M             | pakistani, german | 11,12,13,14 |
| 23 | c.1408C>T            | p.Gln470*                   | 11          | h                    | N             | turkish           | 10          |
| 24 | c.1531G>A            | p. Asp511Asn                | 11          | h                    | M             | pakistani         | 14,22       |
| 25 | C1535G>A             | p.Arg512Gln                 | 11          | ht                   | M             | chinese           | 26          |
| 26 | c.1576G>A            | p.Glu526Lys                 | 12          | h                    | M             | turkish           | 10          |
| 27 | c.1576G>T            | p.Glu526*                   | 12          | h                    | N             | turkish           | 10          |
| 28 | c.1605_1606insT      | p. Glu536*                  | 12          | h                    | N             | turkish           | 23          |
| 29 | c.1642+2T>g          | p.?                         | 12          | ht                   | ss            | polish            | Case 1      |
| 30 | c.1684C>G            | p.His562Asp                 | 13          | ht                   | fs            | korean            | 24          |
| 31 | c.1711_1712insTA     | p.Asn571Ilefs*27            | 13          | ht                   | N             | polish            | Case 3      |
| 32 | c.1777_1778delGA     | p.Asp593Hisfs*9             | 13          | ht                   | N             | polish            | Case 1      |
| 33 | c.1821dupT           | p.Arg608Serfs*26            | 14          | h                    | fs            | french canadian   | 15          |
| 34 | c.1942C>T            | p.Gln648*                   | 15          | h                    | M             | pakistani         | 14          |
| 35 | c.2083delA           | p.Ser696Alafs*4             | 17          | ht                   | fs            | ?                 | 18          |
| 36 | c.2195C>T            | p.Thr732Ile                 | 20          | h                    | M             | pakistani         | 12          |
| 37 | c.2413G>T            | p.Glu805*                   | 20          | ht                   | N             | japanese          | 17          |
| 38 | c.2520+5G>T          | p.Asp823Alafs*5             | 21          | h                    | ss            | pakistani         | 25          |
| 39 | c.2527dup G          | p.asp843glyfs*3             | 22          | h                    | fs            | pakistani         | 24          |
| 40 | c. 2588G>A           | p.Arg863His                 | 22          | h                    | M             | tunisian          | 23          |
| 41 | c.2618dupT           | p.Lys874Glnfs*40            | 22          | ht                   | fs            | chinese, korean   | 26,28       |
| 42 | c.2667_2668GA>TT     | p.[Met8891Ile;Lys890*]      | 22          | h                    |               | pakistani         | 25          |
| 43 | c.2472_2473delAG     | p.Gln918 Glyfs*18           | 23          | ht                   | fs            | north european    | 18          |
| 44 | ?                    | p. Asp955Alafs*111          | 23          | h                    | fs            | ?                 | 23          |
| 45 | c.2864_2867del-IACAG | p.Asp955Alafs*112           | 23          | ht                   | N             | polish, german    | Case 3, 11  |

|    |                        |                   |       |    |     |                     |        |
|----|------------------------|-------------------|-------|----|-----|---------------------|--------|
| 46 | c.2867+4_2867+7delGGTG | Ser956Cysfs*38    | 23 in | h  | ss  | turkish             | 29     |
| 47 | c.3232G>A              | p.Ala1078Thr      | 27    | h  | mis | pakistani           | 22     |
| 48 | c.3335+1G>C            | ?                 | intr  | h  | ss  | italian             | 19     |
| 49 | c.3361delG             | p.Ala1121Glnfs*6  | 28    | h  | fs  | pakistani           | 12,13  |
| 50 | c.3503G>A              | p.Trp1168         | 29    | h  | M   | pakistani           | 13     |
| 51 | c.3839_3855delCAG...   | p.Gly1280Alafs*21 | 30    | h  | fs  | turkish / pakistani | 10,29  |
| 52 | c.3878C>A              | p.Ala1293Asp      | 30    | h  | M   | saudi               | 21     |
| 53 | c.3936_3937insC        | p.Val1314Glyfs*17 | 30    | h  | fs  | turkish             | 14,29  |
| 54 | c.3936dupC             | p.Val1314Argfs*18 | 30    | h  | N   | caucasian           | 12,22  |
| 55 | c.4205delTGCC          | p.Val1402Glyfs*12 | 31    | h  | N   | turkish             | 10     |
| 56 | c.4241dupT             | p.Leu1414Leufs*41 | 31    | h  | fs  | pakistani, german   | 12,22  |
| 57 | c.4258C>T              | p.Gln1420*        | 31    | ht | N   | polish              | Case 2 |

h: homozygote, ht: heterozygote, N: nonsense, fs: frameshift, M: missense, del: deletion, ss: splice site mutation.
